# Supplementary material for: Enhanced electrocatalytic activity of FeNi alloy quantum dot-decorated cobalt carbonate hydroxide nanosword arrays for effective overall water splitting
Source: Royal Society of Chemistry journal article supplement (doi:10.1039/d1nr08035k), 2022-01-01
Supplement: d1nr08035k1.pdf [file d1nr08035k1.pdf]

## Enhanced electrocatalytic activity of FeNi alloy quantum dots decorated cobalt carbonate hydroxide nanoword arrays for effective overall water splitting

Meiru Zhao<sup>+</sup>, Jia Du<sup>+</sup>, Hao Lei, Lingwei Pei, Zhangquan Gong, Xing Wang\*, Haifeng Bao\*

School of Materials Science and Engineering, State Key Laboratory of New Textile Materials and Advanced Processing Technology, Wuhan Textile University, 430200 Wuhan, China

<sup>+</sup>These authors contributed equally.

\*Corresponding author E-mail: wx@wtu.edu.cn, baohai Feng@wtu.edu.cn

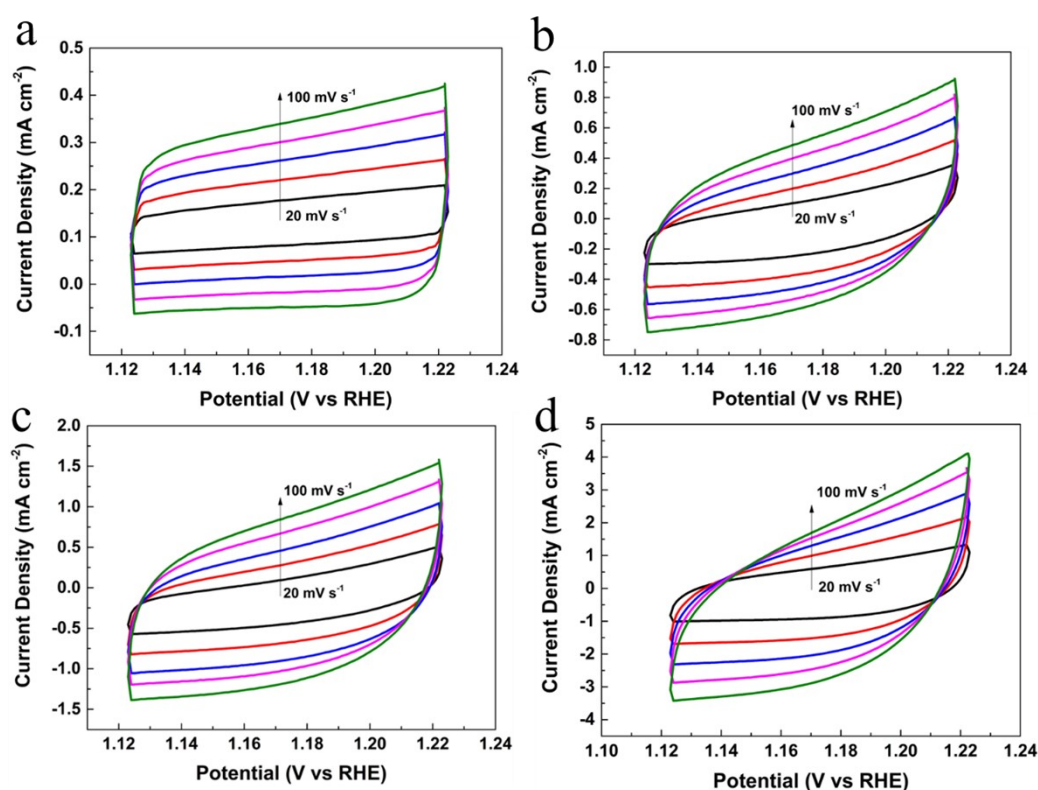

**Fig. S1.** CV curves of (a) CoCH/Ni foam, (b) Ni/CoCH/Ni foam, (c) Fe/CoCH/Ni foam and (d) FeNi/CoCH/Ni foam are taken at various scan rates of 20, 40, 60, 80 and 100 mV/s.

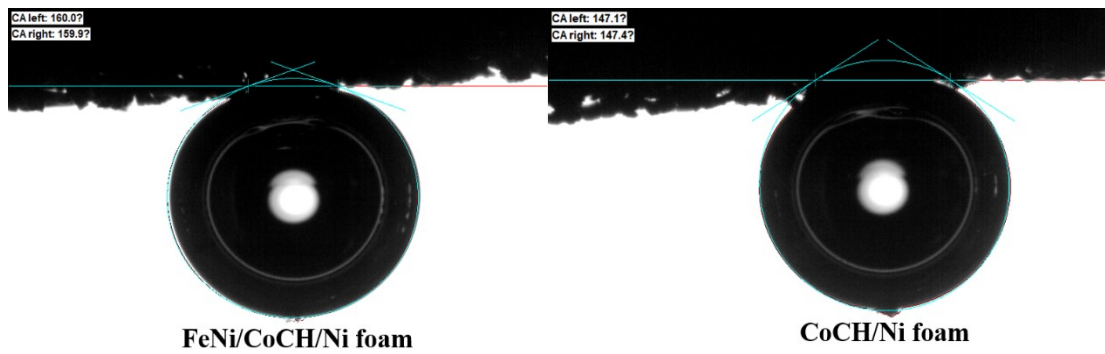

**Fig. S2.** Air-bubble contact angles under water for FeNi/CoCH/Ni foam and CoCH/Ni foam.

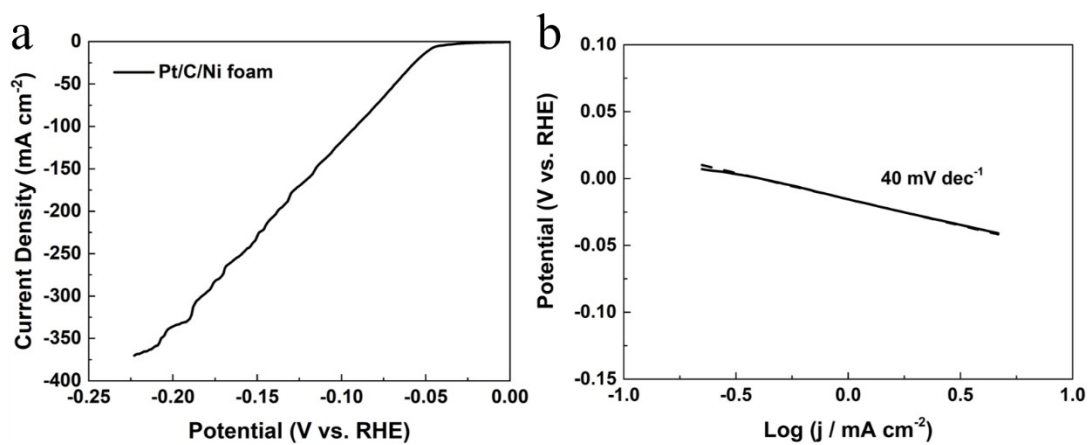

**Fig. S3.** (a) LSV curves and (b) corresponding Tafel plots of Pt/C/Ni foam.

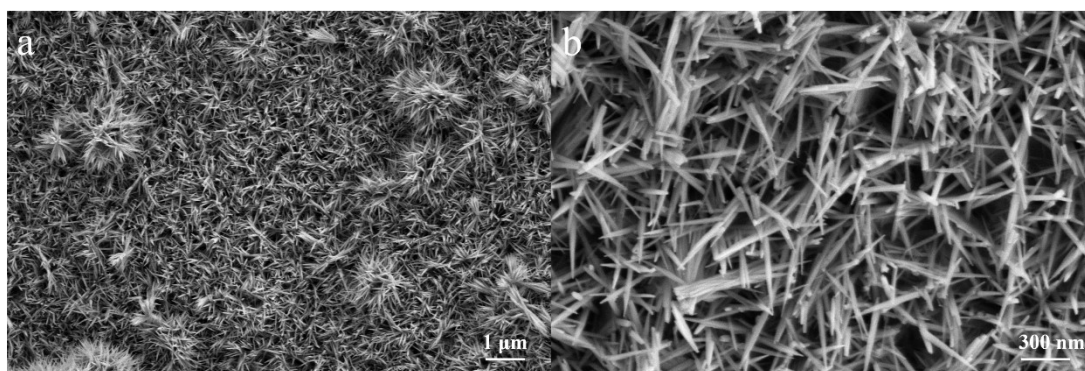

**Fig. S4.** SEM image of FeNi/CoCH/Ni foam after stability test.

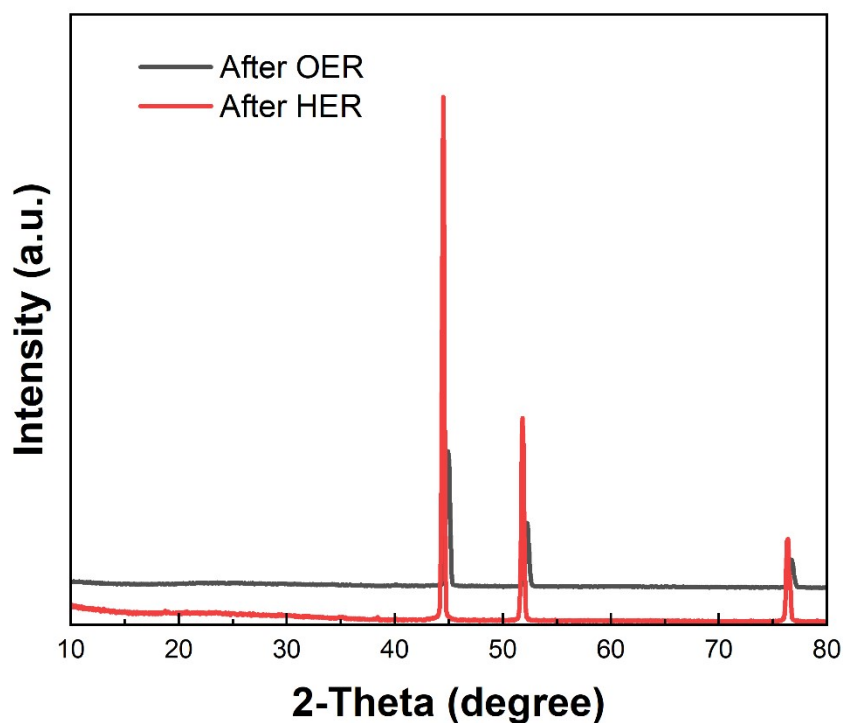

**Fig. S5.** XRD pattern of FeNi/CoCH/Ni foam after overall water splitting test.

**Table S1** Comparison of water-splitting performance of the as-obtained FeNi/CoCH/Ni foam in this work with other recently well-developed electrocatalysts in 1 M KOH ( $V_{10}$ -cell voltage at 10 mA cm<sup>-2</sup>,  $V_{100}$ -cell voltage at 100 mA cm<sup>-2</sup>).

| Catalysts                                             | Support      | $V_{10}$ (V) | $V_{100}$ (V) | Reference |
|-------------------------------------------------------|--------------|--------------|---------------|-----------|
| FeNi/CoCH/Ni foam                                     | Ni foam      | 1.49         | 1.54          | This work |
| Ni <sub>3</sub> FeN/r-GO                              | Ni foam      | 1.6          | 1.96          | [1]       |
| Ni <sub>2</sub> P-Ni <sub>3</sub> S <sub>2</sub> HNAs | Ni foam      | 1.5          | 1.62          | [2]       |
| V-CoP@a-CeO <sub>2</sub>                              | carbon cloth | 1.56         | 1.71          | [3]       |
| Cu-doped Co <sub>9</sub> S <sub>8</sub>               | Ni foam      | 1.49         | /             | [4]       |

|                                     |               |       |      |      |
|-------------------------------------|---------------|-------|------|------|
| Co-Fe oxyphosphide MTs              | /             | 1.63  | 1.84 | [5]  |
| CoMoS <sub>x</sub> /NF              | Ni foam       | /     | 1.74 | [6]  |
| NiCoFe-LDH/Ti                       | Ti mesh       | 1.51  | 1.72 | [7]  |
| CoFeN <sub>x</sub> HNAs/NF          | Ni foam       | 1.592 | /    | [8]  |
| CoP/NF                              | Ni foam       | 1.54  | 1.85 | [9]  |
| Co(OH) <sub>2</sub> /NiMo CA        | carbon cloth  | 1.52  | 1.62 | [10] |
| AQS/S                               | Ni foam       | 1.43  | 1.85 | [11] |
| Ru <sub>1</sub> /D-NiFe LDH         | Ni foam       | 1.44  | 1.54 | [12] |
| CoP@FeCoP                           | carbon paper  | 1.68  | /    | [13] |
| NiP <sub>2</sub> /NiSe <sub>2</sub> | carbon fibers | 1.56  | 1.80 | [14] |
| CoMoN <sub>x</sub> -500 NSAs        | Ni foam       | 1.55  | 1.90 | [15] |

## Reference

1. Y. Gu, S. Chen, J. Ren, Y. A. Jia, C. Chen, S. Komarneni, D. Yang and X. J. A. n. Yao, 2018, **12**, 245-253.
2. L. Zeng, K. Sun, X. Wang, Y. Liu, Y. Pan, Z. Liu, D. Cao, Y. Song, S. Liu and C. Liu, *Nano Energy*, 2018, **51**, 26-36.
3. L. Yang, R. Liu and L. Jiao, *Advanced Functional Materials*, 2020, **30**.
4. X. Du, H. Su and X. Zhang, *ACS Sustainable Chemistry & Engineering*, 2019, **7**, 16917-16926.
5. P. Zhang, X. F. Lu, J. Nai, S. Q. Zang and X. W. D. Lou, *Adv Sci (Weinh)*, 2019, **6**, 1900576.
6. X. Shan, J. Liu, H. Mu, Y. Xiao, B. Mei, W. Liu, G. Lin, Z. Jiang, L. Wen and L. Jiang, *Angewandte Chemie*, 2020, **59**, 1659-1665.
7. D. Li, Z. Liu, J. Wang, B. Liu, Y. Qin, W. Yang and J. Liu, *Electrochimica Acta*, 2020, **340**.

8. D. Li, Y. Xing, R. Yang, T. Wen, D. Jiang, W. Shi and S. Yuan, *ACS Appl Mater Interfaces*, 2020, **12**, 29253-29263.
9. J. Liu, Y. Gao, X. Tang, K. Zhan, B. Zhao, B. Y. Xia and Y. Yan, *Journal of Materials Chemistry A*, 2020, **8**, 19254-19261.
10. Q. Zhang, W. Xiao, W. H. Guo, Y. X. Yang, J. L. Lei, H. Q. Luo and N. B. Li, *Advanced Functional Materials*, 2021, DOI: 10.1002/adfm.202102117.
11. Y. Chen, Z. Yu, R. Jiang, J. Huang, Y. Hou, J. Chen, Y. Zhang, H. Zhu, B. Wang and M. Wang, *Small*, 2021, **17**, e2101003.
12. P. Zhai, M. Xia, Y. Wu, G. Zhang, J. Gao, B. Zhang, S. Cao, Y. Zhang, Z. Li, Z. Fan, C. Wang, X. Zhang, J. T. Miller, L. Sun and J. Hou, *Nat Commun*, 2021, **12**, 4587.
13. J. Shi, F. Qiu, W. Yuan, M. Guo and Z.H. Lu, *Chemical Engineering Journal*, 2021, **403**.
14. L. Yang, L. Huang, Y. Yao and L. Jiao, *Applied Catalysis B: Environmental*, 2021, **282**, 119584.
15. Y. Lu, Z. Li, Y. Xu, L. Tang, S. Xu, D. Li, J. Zhu and D. Jiang, *Chemical Engineering Journal*, 2021, **411**.
